# Supplementary material for: New insight into spatial ecology of Griffon Vulture (Gypsfulvus) on the Balkans provides opportunity for focusing conservation actions for a threatened social scavenger
Source: Biodivers Data J. 2021 Aug 23;9:e71100. doi: 10.3897/BDJ.9.e71100 (PMC8405602; doi:10.3897/BDJ.9.e71100)
Supplement: Supplementary material 1 — Seasonal home-ranges area for all individual birds [file bdj-09-e71100-s001.csv]

Tag	Year	Season	Core area 50% km2	Homerange 95%, km2
A4	2017	Autumn	19.009	230.794
A4	2018	Autumn	8.938	279.146
A4	2018	Spring	15.385	401.269
A4	2018	Summer	6.913	399.323
A4	2018	Winter	5.996	193.930
A4	2019	Spring	13.904	543.861
A4	2019	Summer	13.464	1424.233
A4	2019	Winter	9.597	254.092
1H	2017	Autumn	24.360	1151.919
1H	2017	Summer	126.697	2809.966
1H	2018	Spring	84.030	1954.727
1H	2018	Winter	11.726	293.203
1X	2018	Autumn	5.975	137.427
1X	2018	Spring	151.036	2385.200
1X	2018	Summer	3.967	213.455
1X	2018	Winter	15.405	658.353
1X	2019	Autumn	5.775	340.640
1X	2019	Spring	8.863	199.513
1X	2019	Summer	35.737	1986.857
1X	2019	Winter	2.802	121.109
1X	2020	Autumn	3.058	182.339
1X	2020	Spring	31.828	498.694
1X	2020	Summer	19.772	794.758
1X	2020	Winter	7.491	157.378
1X	2021	Winter	2.638	121.414
2H	2017	Autumn	42.007	2043.683
2H	2017	Summer	39.482	1844.192
2H	2018	Autumn	35.458	880.506
2H	2018	Spring	88.009	2147.845
2H	2018	Summer	49.471	1815.711
2H	2018	Winter	31.935	730.533
2H	2019	Autumn	9.776	196.445
2H	2019	Spring	10.204	227.578
2H	2019	Summer	23.611	1217.128
2H	2019	Winter	9.841	131.597
2H	2020	Spring	18.705	187.350
2H	2020	Winter	21.397	304.438
5	2020	Autumn	3.656	60.692
5	2020	Spring	2.443	127.588
5	2020	Summer	11.533	476.915
5	2021	Winter	7.070	187.566
56	2017	Autumn	2.619	116.348
56	2017	Summer	32.661	1287.618
56	2018	Spring	17.927	1512.779
56	2018	Summer	193.352	4223.949
56	2018	Winter	2.329	120.811
Alexis	2017	Summer	23.983	1248.005
Alexis	2019	Spring	110.142	2028.623
B69	2017	Autumn	6.635	304.377
B69	2017	Summer	98.023	2018.361
B69	2018	Winter	2.341	40.658
B70-UG	2017	Summer	2.481	471.808
B71-XU	2017	Summer	4.167	247.017
BY1	2020	Autumn	10.221	622.395
BY1	2020	Spring	14.421	1397.656
BY1	2020	Summer	25.594	1812.621
BY1	2021	Winter	5.446	548.362
BY3	2020	Autumn	18.862	668.937
BY3	2020	Spring	7.548	517.761
BY3	2020	Summer	5.859	1267.897
C1-M	2018	Autumn	2.973	106.874
C1-M	2018	Spring	1.598	16.876
C1-M	2018	Summer	1.233	110.111
C1-M	2018	Winter	0.096	2.100
C1-M	2019	Spring	3.057	149.879
C1-M	2019	Summer	8.233	954.269
C1-M	2019	Winter	4.101	68.331
C5	2020	Spring	28.864	1563.029
C5	2020	Summer	4.456	408.684
C5	2020	Winter	2.362	185.557
C7	2020	Autumn	35.477	619.868
C9	2020	Autumn	8.278	447.939
C9	2020	Summer	39.117	1474.985
C9	2021	Winter	7.552	1256.347
DEFILE	2020	Autumn	4.216	119.263
DEFILE	2020	Summer	29.310	447.074
DEFILE	2021	Winter	1.939	29.532
E1	2021	Winter	3.675	89.731
F4	2020	Autumn	4.371	138.551
F4	2020	Spring	1.040	64.683
F4	2020	Summer	3.180	155.324
F4	2020	Winter	5.531	118.254
F4	2021	Winter	8.873	445.338
F6	2020	Autumn	4.194	152.055
F6	2020	Spring	4.114	170.222
F6	2020	Summer	2.076	161.659
F6	2020	Winter	5.549	127.489
F6	2021	Winter	5.970	124.058
GD-22 GIANNIS	2020	Autumn	26.466	917.003
GD-22 GIANNIS	2020	Spring	23.801	1081.935
GD-22 GIANNIS	2020	Summer	23.258	1075.535
GD-22 GIANNIS	2021	Winter	22.271	243.194
GS-Athanasios	2021	Winter	14.492	161.941
H1	2017	Autumn	3.138	81.529
H1	2017	Spring	5.405	199.908
H1	2017	Summer	1.617	245.916
H1	2018	Autumn	3.507	72.653
H1	2018	Spring	36.669	669.279
H1	2018	Summer	2.344	135.292
H1	2018	Winter	1.496	37.244
H1	2019	Autumn	9.136	270.453
H1	2019	Spring	5.848	109.477
H1	2019	Summer	5.419	181.203
H1	2019	Winter	1.584	127.267
HW	2020	Autumn	5.141	264.285
HW	2020	Summer	12.004	317.147
HW	2021	Winter	1.674	27.838
K2M	2017	Autumn	2.839	219.459
K2M	2017	Summer	6.089	707.586
K2M	2018	Winter	1.484	17.180
K3A-B2	2020	Autumn	14.102	377.187
K3A-B2	2020	Spring	5.167	101.710
K3A-B2	2020	Summer	12.042	531.267
K5M	2017	Autumn	0.867	74.992
K5M	2017	Spring	1.604	146.422
K5M	2017	Summer	3.555	137.216
K5M	2017	Winter	2.055	24.878
K5M	2018	Winter	2.438	30.598
K7A-B5	2020	Autumn	33.624	697.388
K7A-B5	2020	Spring	184.392	3117.505
K7A-B5	2020	Summer	46.312	1505.303
K7A-B5	2021	Winter	44.963	713.399
K9U	2017	Autumn	22.403	743.750
K9U	2017	Summer	22.196	2336.203
K9U	2018	Spring	200.455	2963.671
K9U	2018	Winter	14.542	469.510
M2	2019	Autumn	3.499	135.091
M2	2019	Spring	7.292	163.362
M2	2019	Summer	1.392	141.860
M2	2020	Spring	5.492	403.420
M2	2020	Summer	4.521	151.381
M2	2020	Winter	2.149	83.177
OX	2017	Autumn	48.415	2187.205
OX	2017	Spring	4.145	1105.927
OX	2017	Summer	29.422	596.548
OX	2017	Winter	2.854	93.172
OX	2018	Winter	6.395	93.439
P-B2F	2017	Autumn	11.653	554.186
P-B2F	2018	Winter	11.874	374.718
V3	2018	Autumn	16.405	814.271
V3	2018	Spring	2.001	14.837
V3	2018	Summer	8.499	430.623
V3	2019	Autumn	3.208	94.727
V3	2019	Spring	22.254	1257.542
V3	2019	Summer	13.348	598.928
V3	2019	Winter	4.549	363.434
V3	2020	Autumn	11.355	1487.928
V3	2020	Spring	244.085	4855.929
V3	2020	Summer	17.577	508.285
V3	2020	Winter	8.213	883.069
V3	2021	Winter	9.076	1155.124
V8	2018	Autumn	2.483	62.128
V8	2018	Spring	1.742	26.787
V8	2018	Summer	4.142	270.033
V8	2019	Autumn	2.286	34.839
V3	2019	Spring	4.751	411.867
V8	2019	Summer	41.510	1257.532
V8	2019	Winter	1.360	88.475
XE	2020	Autumn	2.148	108.457
XE	2020	Summer	2.638	332.142
XE	2021	Winter	2.983	79.536
XJ	2019	Autumn	2.896	68.338
XJ	2019	Spring	2.873	74.555
XJ	2019	Summer	2.140	139.853
XJ	2020	Autumn	2.976	141.145
XJ	2020	Spring	3.654	92.079
XJ	2020	Summer	4.900	338.273
XJ	2020	Winter	1.899	90.436
XJ	2021	Winter	1.803	36.560
Y1	2020	Autumn	7.078	465.835
Y1	2020	Spring	7.456	772.411
Y1	2020	Summer	50.615	3339.845
Y1	2020	Winter	1.183	61.057
Y1	2021	Winter	4.785	131.682
Y2	2020	Autumn	27.445	873.888
Y2	2020	Spring	13.045	1029.785
Y2	2020	Summer	5.791	875.907
Y2	2021	Winter	41.083	513.325
Y4	2020	Spring	8.944	1313.379
Y4	2020	Summer	27.693	1506.280
Y4	2020	Winter	9.635	1147.928
Y5	2019	Autumn	1.393	17.423
Y5	2020	Spring	35.865	3920.094
Y5	2020	Summer	160.588	5292.275
Y5	2020	Winter	1.522	61.209
Y7	2019	Autumn	1.496	16.452
Y7	2020	Autumn	16.145	380.656
Y7	2020	Spring	4.291	1080.615
Y7	2020	Summer	17.538	904.277
Y7	2020	Winter	1.336	26.348
Y7	2021	Winter	1.412	111.333
Y7	2020	Autumn	21.804	616.706
Y8	2020	Spring	81.156	1846.866
Y8	2020	Summer	27.709	1211.522
Y8	2021	Winter	8.378	195.089
Y9	2020	Summer	64.680	1530.682
Z7	2020	Autumn	2.897	132.048
Z7	2021	Winter	10.688	204.448
B65	2019	Autumn	4.939	164.543
B65	2019	Summer	8.875	278.548
B65	2020	Autumn	9.178	218.412
B65	2020	Spring	8.344	468.067
B65	2020	Summer	12.210	696.312
B65	2020	Winter	9.786	341.124
B65	2021	Winter	2.946	188.256
